# Supplementary material for: The Effect of Silver Nanoparticle Addition on Micropropagation of Apricot Cultivars (Prunus armeniaca L.) in Semisolid and Liquid Media
Source: MDPI journal article supplement (doi:10.3390/plants12071547), 2023-04-03
Supplement: s1 [file s1]

Table S1. Polynomial equations calculated for predicted values of variables in which significant differences between treatments for each cultivar were found. N.D.= no differences were found.

| <b>Variables</b>      | <b>Polynomial equations</b>                       |
|-----------------------|---------------------------------------------------|
| <b>Silver content</b> |                                                   |
| SSM 'Canino'          | $y = 2.625 + 0.036 x$                             |
| SSM 'Mirlo Rojo'      | $y = 1.124 + 0.088 x - 0.0006 x^2$                |
| TIS 'Canino'          | $y = 2.384 + 1.034 x - 0.0076 x^2$                |
| TIS 'Mirlo Rojo'      | $y = 3.615 + 0.727 x - 0.0050 x^2$                |
| <b>Proliferation</b>  |                                                   |
| SSM 'Canino'          | $y = 2.100 - 0.009 x$                             |
| SSM 'Mirlo Rojo'      | $y = 1.480 - 0.004 x$                             |
| TIS 'Canino'          | $y = 2.410 + 0.038 x$                             |
| TIS 'Mirlo Rojo'      | $y = 1.100 + 0.008 x$                             |
| <b>Shoot length</b>   |                                                   |
| SSM 'Canino'          | N.D.                                              |
| SSM 'Mirlo Rojo'      | N.D.                                              |
| TIS 'Canino'          | $y = 1.904 - 0.014 x - 0.0001 x^2$                |
| TIS 'Mirlo Rojo'      | N.D.                                              |
| <b>Productivity</b>   |                                                   |
| SSM 'Canino'          | $y = 2.900 - 0.012 x$                             |
| SSM 'Mirlo Rojo'      | $y = 1.810 - 0.005 x$                             |
| TIS 'Canino'          | $y = 4.130 + 0.048 x$                             |
| TIS 'Mirlo Rojo'      | $y = 1.370 + 0.013 x$                             |
| <b>Leaf surface</b>   |                                                   |
| SSM 'Canino'          | N.D.                                              |
| SSM 'Mirlo Rojo'      | $y = 0.905 + 0.010 x - 0.0004 x^2 + 0.000004 x^3$ |
| TIS 'Canino'          | N.D.                                              |
| TIS 'Mirlo Rojo'      | N.D.                                              |
| <b>Fresh weight</b>   |                                                   |
| SSM 'Canino'          | $y = 380.600 - 2.600 x$                           |
| SSM 'Mirlo Rojo'      | N.D.                                              |
| TIS 'Canino'          | $y = 867.440 + 9.370 x$                           |
| TIS 'Mirlo Rojo'      | $y = 467.400 + 8.600 x$                           |
| <b>Dry weight</b>     |                                                   |
| SSM 'Canino'          | $y = 43.600 - 0.250 x$                            |
| SSM 'Mirlo Rojo'      | $y = 29.600 - 0.140 x$                            |
| TIS 'Canino'          | $y = 60.000 + 0.621 x$                            |
| TIS 'Mirlo Rojo'      | $y = 41.420 + 0.620 x$                            |

Table S2. *F*-values obtained in ANOVA analysis for proliferation, shoot length, productivity, leaf surface, fresh weight, and dry weight in two apricot cultivars cultured in two cultivation systems and different AgNPs treatments.

| Source of variation | Degree of freedom | F-value | p>     |
|---------------------|-------------------|---------|--------|
| Proliferation       |                   |         |        |
| System (S)          | 1                 | 291.10  | 0.0001 |
| Cultivar (C)        | 1                 | 352.68  | 0.0001 |
| Treatment (T)       | 4                 | 12.15   | 0.0001 |
| S x C               | 1                 | 209.38  | 0.0001 |
| S x T               | 4                 | 38.09   | 0.0001 |
| C x T               | 4                 | 7.41    | 0.0001 |
| S x C x T           | 4                 | 14.23   | 0.0001 |
| Shoot length        |                   |         |        |
| System (S)          | 1                 | 14.13   | 0.0002 |
| Cultivar (C)        | 1                 | 57.35   | 0.0001 |
| Treatment (T)       | 4                 | 1.94    | 0.1029 |
| S x C               | 1                 | 0.00    | 0.9473 |
| S x T               | 4                 | 1.04    | 0.3858 |
| C x T               | 4                 | 3.68    | 0.0058 |
| S x C x T           | 4                 | 4.79    | 0.0009 |
| Productivity        |                   |         |        |
| System (S)          | 1                 | 365.81  | 0.0001 |
| Cultivar (C)        | 1                 | 468.93  | 0.0001 |
| Treatment (T)       | 4                 | 10.33   | 0.0001 |
| S x C               | 1                 | 243.00  | 0.0001 |
| S x T               | 4                 | 31.62   | 0.0001 |
| C x T               | 4                 | 5.26    | 0.0004 |
| S x C x T           | 4                 | 9.79    | 0.0001 |
| Leaf surface        |                   |         |        |
| System (S)          | 1                 | 277.84  | 0.0001 |
| Cultivar (C)        | 1                 | 6.14    | 0.0136 |
| Treatment (T)       | 4                 | 1.29    | 0.2744 |
| S x C               | 1                 | 0.38    | 0.5373 |
| S x T               | 4                 | 2.99    | 0.0185 |
| C x T               | 4                 | 1.98    | 0.0959 |
| S x C x T           | 4                 | 6.44    | 0.0001 |
| Fresh weight        |                   |         |        |
| System (S)          | 1                 | 210.84  | 0.0001 |
| Cultivar (C)        | 1                 | 15.37   | 0.0001 |
| Treatment (T)       | 4                 | 4.82    | 0.0011 |
| S x C               | 1                 | 10.66   | 0.0014 |
| S x T               | 4                 | 9.78    | 0.0001 |
| C x T               | 4                 | 0.05    | 0.9947 |
| S x C x T           | 4                 | 0.14    | 0.9670 |
| Dry weight          |                   |         |        |
| System (S)          | 1                 | 146.34  | 0.0001 |
| Cultivar (C)        | 1                 | 9.27    | 0.0028 |
| Treatment (T)       | 4                 | 2.74    | 0.0310 |
| S x C               | 1                 | 1.45    | 0.2308 |
| S x T               | 4                 | 9.99    | 0.0001 |
| C x T               | 4                 | 0.18    | 0.9503 |
| S x C x T           | 4                 | 0.13    | 0.9729 |

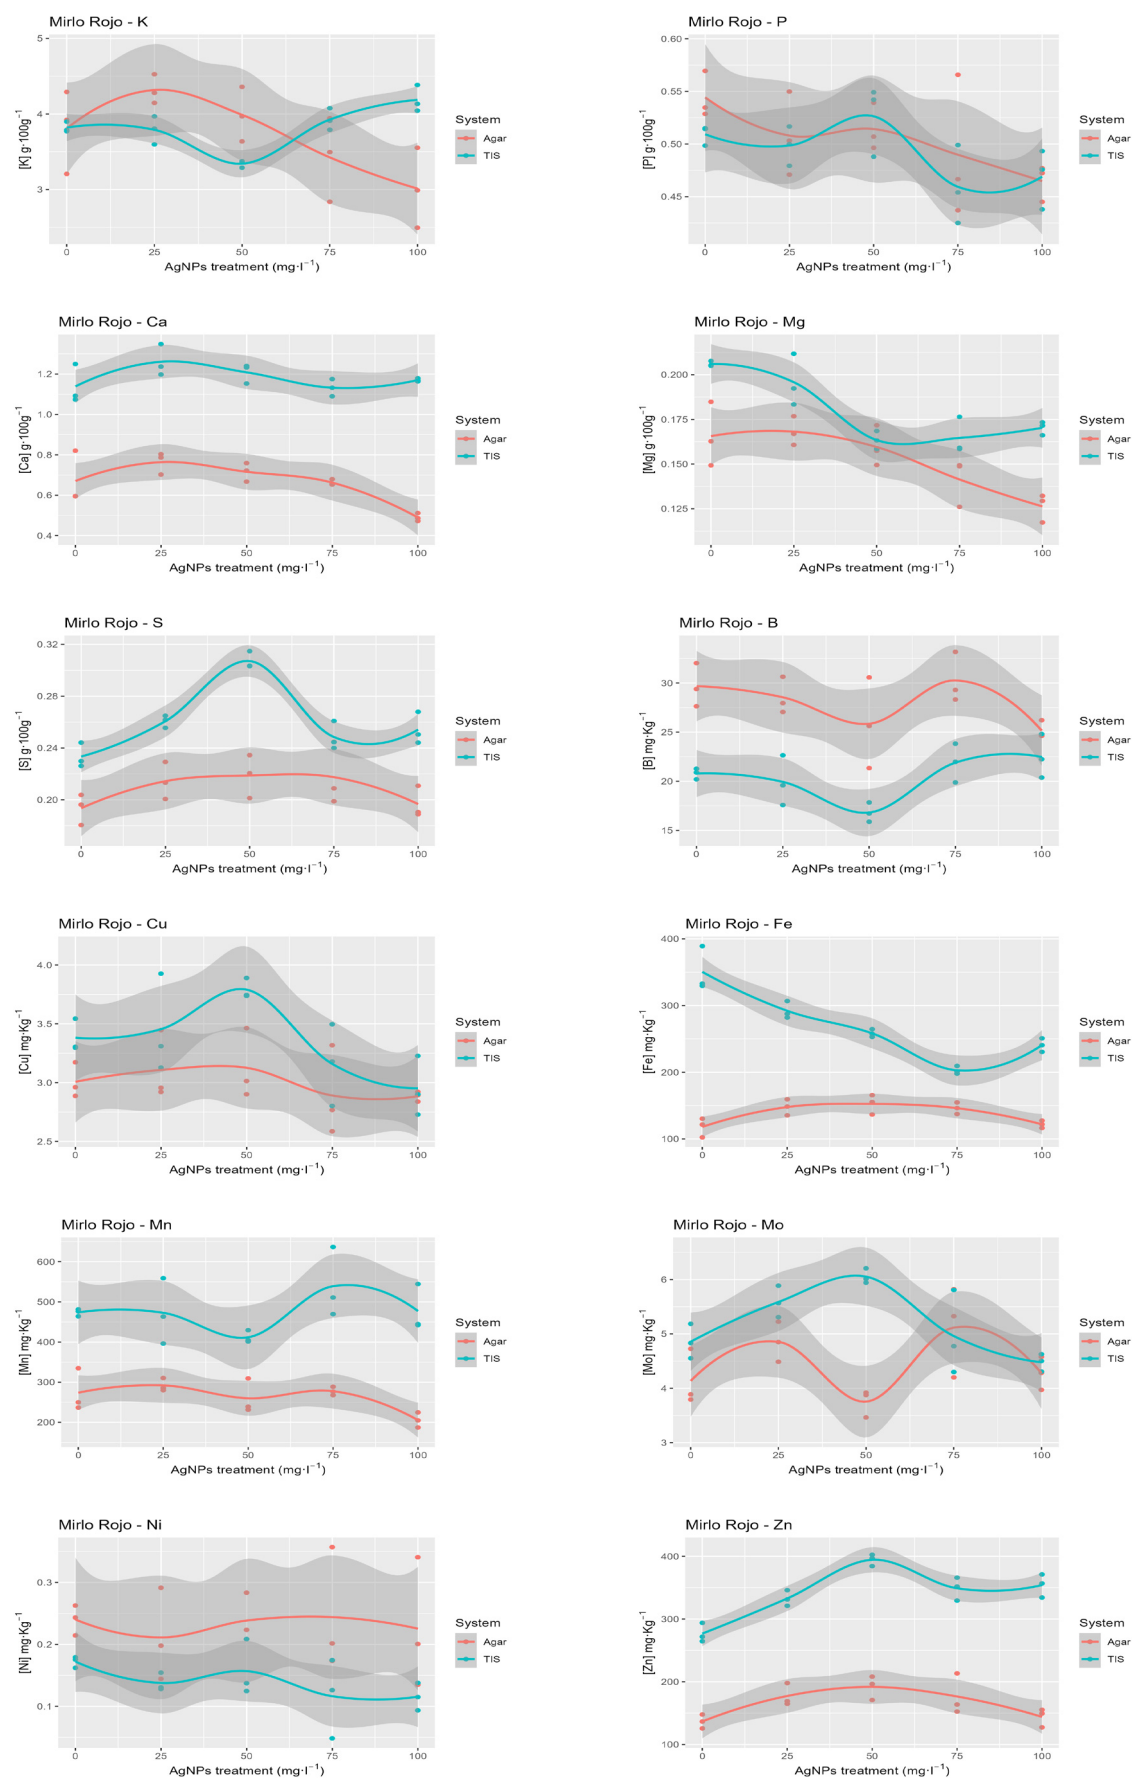

**Figure S1.** Ions concentration vs. AgNPs concentration for 'Mirlo Rojo'. The line represents the loess regression of the points. Shaded areas represent the 95% confidence interval for the prediction.

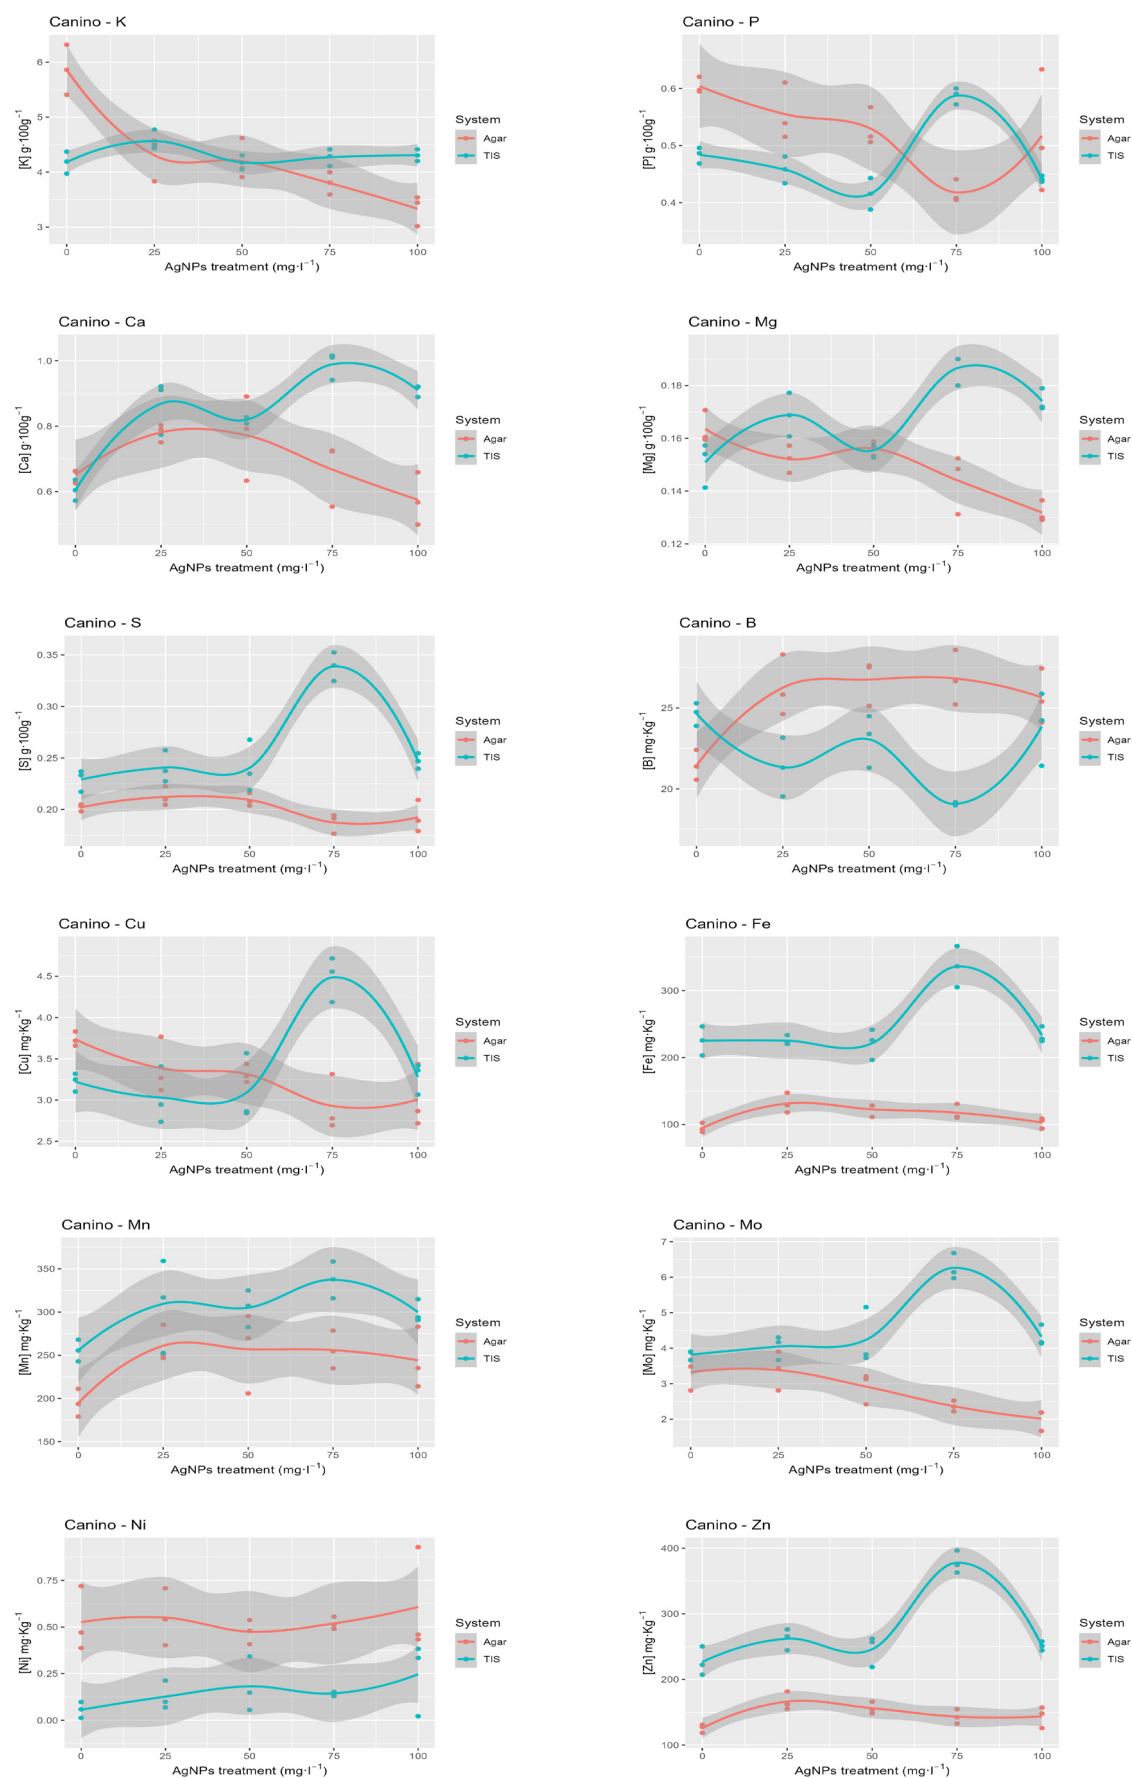

**Figure S2.** Ions concentration vs. AgNPs concentration for 'Canino'. The line represents the loess regression of the points. Shaded areas represent the 95% confidence interval for the prediction.
